# Supplementary material
Source: publisher site journal article supplement (https://www.spandidos-publications.com/6583/downloadSupplementary)
Supplement: Supplementary file 1 [file downloadSupplementary]

## Sheet: Fig 5D
Table SIII. In vivo study raw data and statistical analysis.
Time	Vehicle													Enz 10µM													ODM201													ADA-308 25mg/kg
0	222.071	367.566	225.148	308.923	274.824	311.541	207.934	395.579	237.387	312.85	279.798	236.536	227.962	395.186	309.84	213.628	251.196	215.199	421.89	245.437	294.524	232.085	345.052	329.409			347.931	216.77	201.062	194.19	365.603	227.137	225.213	232.871	281.434	218.341	251.327	243.277		460.309	228.813	269.653	253.487	364.687	416.457	314.159	192.619	206.167	218.537
0.5	299.433	484.983	397.411	419.403	387.987	458.28	299.106	415.934	277.442	306.305	413.512	333.794	351.728	510.051	321.228	234.572	290.794	300.415	771.654	413.643	442.114	553.706	534.071	382.554			668.178	236.143	181.1	235.619	613.003	564.898	221.482	494.801	334.122	313.374	278.031	277.835		641.409	214.414	306.829	260.556	393.746	702.735	353.953	211.861	215.984	217.359
1	349.044	574.257	443.619	705.68	459.458	871.792	509.723	505.993	459.851	378.955	479.878	366.519	507.367	490.481	484.394	282.743	443.946	455.138	979.391	467.181	549.321	1000.21	728.85	713.338			668.112	266.381	187.383	239.808	841.947	522.29	324.5	551.35	480.14	490.089	428.042	312.065		787.362	214.414	327.249	276.198	692.459	892.54	429.482	192.684	261.734	255.254
1.5	460.243	973.108	583.289	764.192	524.122	1025.27	643.241	615.752	990.191	484.263	650.048	510.116	735.133	633.227	684.867	364.556	538.26	783.827	1770.88	746.128	762.36	1785.99	965.778	818.385			720.472	289.812	176.06	260.49	966.171	786.511	297.47	643.699	581.326	575.173		314.159		728.588	226.98	322.799	289.812	635.911	1029.53	470.519	197.92	270.962	292.561
2	534.071	1258.93	658.818	1006.62	608.684	1613.01	919.832	888.809	1250.75	719.163	814.523	647.168	1292.11	758.695	1128.22	432.362	725.184	909.36		1076.13	1184.38		1317.64	1053.74			866.032	326.726	197.92	250.673	944.441	680.678	301.593	672.432	747.437	627.991		332.354		630.675	251.851	474.904	343.023	659.735	953.081	478.569	194.255	272.533	290.859
2.5	537.212	1487.02	854.71	1075.73	857.655		1533.88	1052.11	1564.25	989.602	1296.43	1027.56	1979.2	863.938	1462.02	539.307	1129.93	1479.82		2277.66	1740.44		1405.6	1623.42			930.435	362.265	205.185	232.478	1015.91	663.4	290.597	834.158	907.92	699.79		388.183		688.009	290.205	526.217	342.826	738.274	1072.07	606.327	230.711	308.007	295.833
3	664.578	1884.3	1083.52	1099.56	1114.22			1617.92		1503.25	1541.08	1246.16		1305.59	2425.31	876.504	1653.59	1953.87					1838.62				922.843	483.282	247.4	221.875	1084.24	753.393	329.867	854.12	1151.59	843.714		437.663		740.238		546.375	384.452	738.274	1119.98	670.861	232.609	337.787	386.612
Time (weeks)	Vehicle		Enz 10µM		ODM201		ADA-308 25mg/kg		ADA-308 50mg/kg			ENZ vs. Vehicle
0	0	0	0	0	0	0	0	0	0	0		Paired t test
0.5	36.485	20.6886	46.268	39.7104	43.8881	50.3597	16.8911	20.546	35.0173	31.9317		P value	0.2665
1	86.3701	46.945	106.253	82.1813	72.1946	50.2476	43.318	39.5462	58.6294	37.5941		P value summary	ns
1.5	154.28	75.1827	210.082	171.009	98.2402	81.5213	54.9672	48.0438	94.8575	49.6158		Significantly different (P < 0.05)?	No
2	245.848	124.707	234.679	91.0587	108.877	78.0226	68.1244	54.0708	144.032	74.0427		One- or two-tailed P value?	Two-tailed
2.5	352.606	198.426	399.947	217.677	128.742	94.0074	98.5509	78.1759	190.539	109.791		t, df	t=1.207, df=7
3	346.849	84.4402	503.751	221.24	158.409	108.07	122.774	91.4323	236.784	134.287		Number of pairs	8
3.5	476.741	202.71	415.699	114.063	187.274	120.183	154.738	115.616	288.772	193.198
												ODM201 vs. Vehicle
												Paired t test
												P value	0.0261
												P value summary	*
												Significantly different (P < 0.05)?	Yes
												One- or two-tailed P value?	Two-tailed
												t, df	t=2.812, df=7
												Number of pairs	8
												ADA-308 25mg/kg vs. Vehicle
												Paired t test
												P value	0.0118
												P value summary	*
												Significantly different (P < 0.05)?	Yes
												One- or two-tailed P value?	Two-tailed
												t, df	t=3.376, df=7
												Number of pairs	8
												ADA-308 50mg/kg vs. Vehicle
												Paired t test
												P value	0.0144
												P value summary	*
												Significantly different (P < 0.05)?	Yes
												One- or two-tailed P value?	Two-tailed
												t, df	t=3.231, df=7
												Number of pairs	8
Time	Vehicle	Enz 10µM	ODM201	ADA-308 25mg/kg	ADA-308 50mg/kg
0	1	1	1	1	1
0.5	1	1	1	1	1
0.5	1	1	1	1	1
1	1	1	1	1	1
1	1	1	1	1	1
1.5	1	1	1	1	1
1.5	1	0.9	1	1	1
2	1	0.9	1	1	1
2	0.923077	0.9	1	1	1
2.5	0.923077	0.9	1	1	1
2.5	0.692308	0.6	1	1	1
3	0.692308	0.6	1	1	1
3	0.384615	0.2	0.916667	1	1
3.5	0.384615	0.2	0.916667	1	1
3.5	0.153846	0.1	0.833333	1	0.916667
4	0.153846	0.1	0.833333	1	0.916667
4	0.076923		0.666667	0.909091	0.833333
4.5	0.076923		0.666667	0.909091	0.833333
4.5	0.076923		0.5	0.727273	0.75
5	0.076923		0.5	0.727273	0.75
5	0.076923		0.416667	0.545455	0.583333
5.5	0.076923		0.416667	0.545455	0.583333
5.5	0		0.25	0.454545	0.333333
6	0		0.25	0.454545	0.333333
6			0.25	0.454545	0.333333
6.5			0.25	0.454545	0.333333
6.5			0.166667	0.181818	0.25
7			0.166667	0.181818	0.25
7			0.166667	0.181818	0.166667
7.5			0.166667	0.181818	0.166667
7.5			0.166667	0.181818	0.166667
8			0.166667	0.181818	0.166667
8			0.166667	0.181818	0.166667
8.5			0.166667	0.181818	0.166667
[truncated: 18 more columns]
